# Supplementary material for: Tofacitinib and Baricitinib Are Taken up by Different Uptake Mechanisms Determining the Efficacy of Both Drugs in RA
Source: MDPI journal article supplement (doi:10.3390/ijms21186632), 2020-09-10
Supplement: s1 [file s1]

# Supplementary Materials

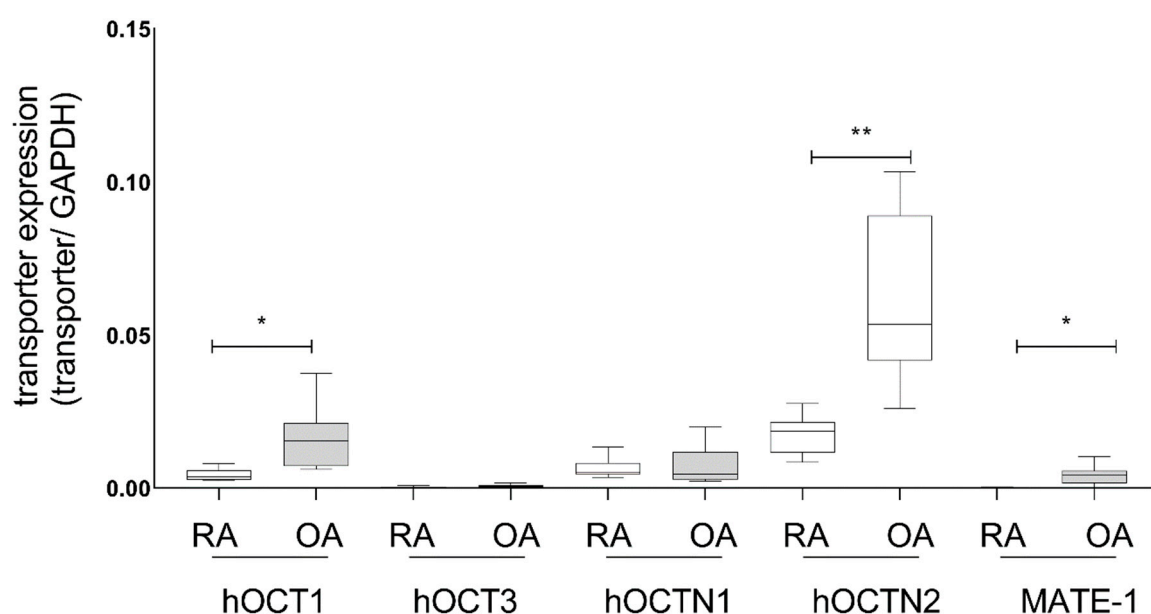

Supplementary Figure S1: Expression of organic cation transporters in PBMCs of OA and RA patients

Supplementary Table S1: Primer for qRT-PCR

| Gen name                       |    | Primer sequence (5' → 3')        |
|--------------------------------|----|----------------------------------|
| GAPDH                          | S  | CAA GCT CAT TTC CTG GTA TGA C    |
|                                | AS | GTG TGG TGG GGG ACT GAG TGT GG   |
| OCT1                           | S  | CAT CAT AAT CAT GTG TGT TGG CC   |
|                                | AS | CAA ACA AAA TGA GGG GCA AGG CTT  |
| OCT3                           | S  | CCATCGTCAGCGAGTTTGAC             |
|                                | AS | AAGTTTGGTGCAAAGGCCAC             |
| OCTN1                          | S  | TC CAG AAA CCT TAG AGC AGA TGC   |
|                                | AS | GA ATG CAG TTA TTA GAA CCT TGG G |
| OCTN2                          | S  | GTA CCC CAC TCC CAG ACA CC       |
|                                | AS | GCTGTGCTTTTAAGGATTGTGGG          |
| MATE-1                         | S  | GCA ACC ACA CTT GGA GTG ATG G    |
|                                | AS | GAG CAG AAT TCC CAC TCC GAG      |
| <i>S: Sense; AS: Antisense</i> |    |                                  |
